# Supplementary material
Source: PubMed Central journal article supplement (PMC10397676)
Supplement: EIJ-D-23-00107_Yamamoto_SD.pdf [file EIJ-D-23-00107_Yamamoto_SD.pdf]

## Supplementary data

**Supplementary Table 1. Procedural information of index PCI.**

| <b>Variable</b>                         | <b>n = 105</b> |
|-----------------------------------------|----------------|
| Stent                                   |                |
| 1 <sup>st</sup> generation DES          | 27 (25.7%)     |
| 2 <sup>nd</sup> generation DES          | 73 (69.5%)     |
| Bare metal stent                        | 5 (4.8%)       |
| Duration between index PCI to follow-up | 1.2 (0.6-3.2)  |
| Atherectomy                             |                |
| Rotational atherectomy                  | 8/66 (12.1)    |
| Scoring balloon                         | 9/66 (13.6)    |

Values are n (%) or median (first, third quartile). DES denotes drug-eluting stent.

**Supplementary Table 2. Comparison of primary causes between with versus without predilatation.**

|                             | <b>Lesions without<br/>pre-dilatation<br/>(n=98)</b> | <b>All lesions<br/>(n=139)</b> | <b>p-value</b> |
|-----------------------------|------------------------------------------------------|--------------------------------|----------------|
| <u>Biological cause</u>     | 51 (52.0)                                            | 74 (53.2)                      | 0.89           |
| Neointimal hyperplasia      | 27 (27.6)                                            | 35 (25.2)                      | 0.76           |
| Neoatherosclerosis          | 16 (16.3)                                            | 30 (21.6)                      | 0.40           |
| Uncovered ostium            | 8 (8.2)                                              | 9 (6.5)                        | 0.62           |
| <u>Mechanical cause</u>     | 47 (48.0)                                            | 65 (46.8)                      | 0.89           |
| Stent fracture              | 25 (25.5)                                            | 35 (25.2)                      | 0.99           |
| Underexpansion              | 10 (10.2)                                            | 15 (10.8)                      | 0.99           |
| Protruding calcified nodule | 12 (12.2)                                            | 15 (10.8)                      | 0.84           |

Values are n (%)

**Supplementary Table 3. Angiographic findings for lesions with and without stent fracture.**

| <b>Variable</b>                   | <b>Lesions with fracture (n=71)</b> | <b>Lesions without fracture (n=68)</b> | <b>p-value</b> |
|-----------------------------------|-------------------------------------|----------------------------------------|----------------|
| Multi-vessel disease*             | 55 (77.5)                           | 56 (82.4)                              | 0.53           |
| Calcification of ascending aorta  | 25 (35.2)                           | 17 (25.0)                              | 0.20           |
| Target lesion calcification       |                                     |                                        |                |
| Moderate                          | 24 (33.8)                           | 19 (27.9)                              | 0.47           |
| Severe                            | 16 (22.5)                           | 18 (26.5)                              | 0.69           |
| Radiolucent mass                  | 6 (8.5)                             | 8 (11.8)                               | 0.58           |
| In stent restenosis pattern       |                                     |                                        | 0.51           |
| Focal                             |                                     |                                        |                |
| Proximal stent edge               | 52 (73.2)                           | 48 (70.6)                              |                |
| Multi focal                       | 11 (15.5)                           | 9 (13.2)                               |                |
| Diffuse                           |                                     |                                        |                |
| Intra-stent                       | 2 (2.8)                             | 6 (8.8)                                |                |
| Proliferative                     | 1 (1.4)                             | 0                                      |                |
| Total occlusion                   | 5 (7.0)                             | 5 (7.4)                                |                |
| Quantitative coronary angiography |                                     |                                        |                |
| Lesion length (mm)                | 6.5 (5.4, 10.3)                     | 7.1 (4.9, 12.4)                        | 0.81           |
| Reference vessel diameter (mm)    | 2.8 (2.6, 3.1)                      | 2.8 (2.5, 3.1)                         | 0.83           |
| Minimum lumen diameter (mm)       |                                     |                                        |                |
| Pre-PCI                           | 1.0 (0.75, 1.3)                     | 1.2 (0.8, 1.5)                         | 0.32           |
| Post-PCI                          | 2.7 (2.3, 3.0)                      | 2.7 (2.4, 3.0)                         | 0.49           |
| Diameter stenosis (%)             |                                     |                                        |                |
| Pre-PCI                           | 64.3 (50.8, 71.5)                   | 56.7 (48.3, 71.8)                      | 0.32           |
| Post-PCI                          | 13.9 (8.4, 24.8)                    | 12.2 (7.7, 17.5)                       | 0.35           |

Values are n (%) or median (first, third quartile). \*defined as the presence of >50% luminal diameter stenosis in two or more major epicardial arteries. PCI denotes percutaneous coronary intervention

**Supplementary Table 4. Comparison of clinical and angiographical characteristics with versus without a new stent implantation for the treatment of in-stent restenosis due to a mechanical cause.**

|                                                     | <b>New stent (+)</b><br><b>n=32</b> | <b>New stent (-)</b><br><b>n=33</b> | <b>P value</b> |
|-----------------------------------------------------|-------------------------------------|-------------------------------------|----------------|
| <i>Clinical characteristics</i>                     |                                     |                                     |                |
| Age (years)                                         | 72 (67, 80)                         | 72 (66, 75)                         | 0.35           |
| Women                                               | 15 (46.9)                           | 13 (39.4)                           | 0.62           |
| Hypertension                                        | 32 (100)                            | 33 (100)                            | -              |
| Dyslipidemia                                        | 32 (100)                            | 33 (100)                            | -              |
| Diabetes mellitus                                   | 17 (53.1)                           | 17 (51.5)                           | 0.99           |
| Insulin-treated                                     | 5 (15.6)                            | 5 (15.2)                            | 0.99           |
| Chronic kidney disease*                             | 12 (37.5)                           | 14 (42.4)                           | 0.80           |
| Dialysis                                            | 0 (0)                               | 4 (12.1)                            | 0.11           |
| Peripheral artery disease                           | 6 (18.8)                            | 5 (15.2)                            | 0.75           |
| Prior myocardial infarction                         | 6 (18.8)                            | 9 (27.3)                            | 0.56           |
| Prior coronary artery bypass grafting               | 8 (25.0)                            | 7 (21.2)                            | 0.77           |
| Prior or current moderate or severe aortic stenosis | 5 (15.6)                            | 4 (12.1)                            | 0.73           |
| Duration from prior stent implantation (years)      | 0.8 (0.3,2.0)                       | 1.9 (0.7, 3.4)                      | 0.17           |
| Clinical presentation at the time of ISR            |                                     |                                     |                |
| Non-ST elevation myocardial infarction              | 3 (9.4)                             | 4 (12.1)                            | 0.99           |
| Unstable angina                                     | 8 (25.0)                            | 21 (63.6)                           | 0.003          |
| Stable coronary artery disease                      | 21 (65.6)                           | 8 (24.2)                            | 0.001          |
| <i>Angiographical characteristics</i>               |                                     |                                     |                |
| Multi-vessel disease                                | 27 (84.4)                           | 26 (78.8)                           | 0.75           |
| Calcification of ascending aorta                    | 9 (28.1)                            | 13 (39.4)                           | 0.43           |
| Target lesion calcification                         |                                     |                                     |                |
| Moderate                                            | 10 (31.3)                           | 12 (36.4)                           | 0.79           |
| Severe                                              | 10 (31.3)                           | 9 (27.3)                            | 0.79           |
| Radiolucent mass                                    | 3 (9.4)                             | 7 (21.2)                            | 0.30           |
| In stent restenosis pattern                         |                                     |                                     |                |
| Focal                                               | 27 (84.4)                           | 32 (96.8)                           | 0.10           |
| Proximal stent edge                                 | 24 (75.0)                           | 28 (84.9)                           | 0.37           |

|                                |                   |                   |      |
|--------------------------------|-------------------|-------------------|------|
| Multi focal                    | 3 (9.4)           | 4 (12.1)          | 0.99 |
| Diffuse                        | 2 (6.3)           | 1 (3.0)           | 0.61 |
| Proliferative                  | 0 (0)             | 0 (0)             | -    |
| Total occlusion                | 3 (9.4)           | 0 (0)             | 0.11 |
| Lesion length (mm)             | 6.4 (5.3, 8.9)    | 6.3 (5.1, 9.4)    | 0.95 |
| Reference vessel diameter (mm) | 2.8 (2.6, 3.0)    | 2.8 (2.4, 3.2)    | 0.76 |
| Minimum lumen diameter (mm)    |                   |                   |      |
| Pre-PCI                        | 1.0 (0.8, 1.3)    | 1.1 (0.7, 1.5)    | 0.40 |
| Post-PCI                       | 2.7 (2.4, 3.0)    | 2.3 (2.2, 2.6)    | 0.01 |
| Diameter stenosis (%)          |                   |                   |      |
| Pre-PCI                        | 64.3 (51.4, 71.3) | 60.3 (50.2)       | 0.45 |
| Post-PCI                       | 11.3 (8.2, 20.4)  | 21.0 (10.0, 30.3) | 0.03 |

---

Values are n (%) or median (first, third quartile). \*Defined as estimated glomerular filtration rate <60 mL/min/1.73 m<sup>2</sup> calculated using the Modification of Diet in Renal Disease equation. ISR denotes in-stent restenosis; PCI, percutaneous coronary intervention.

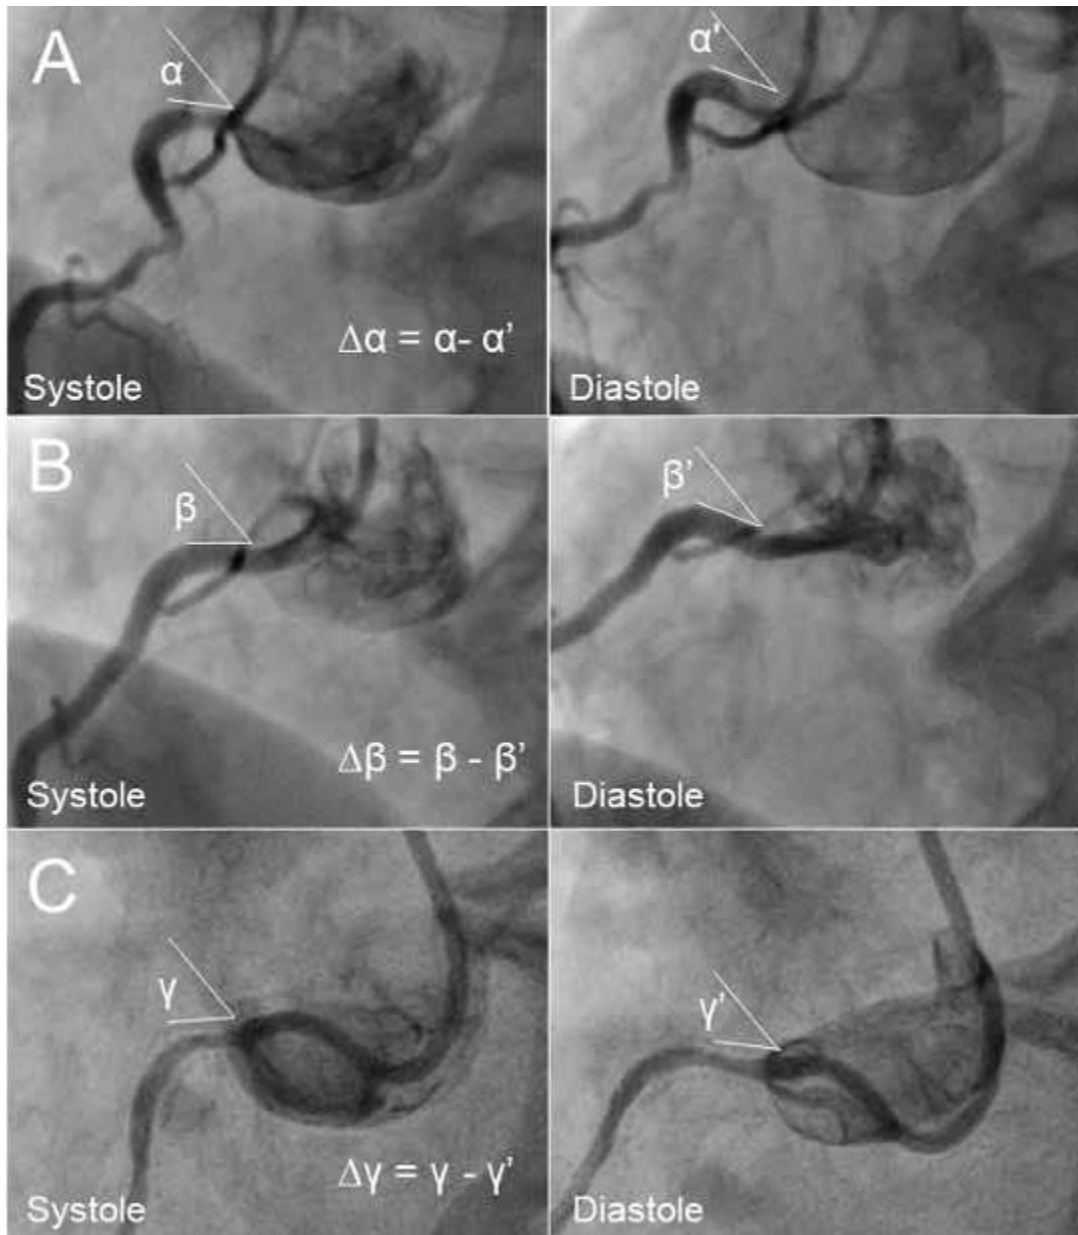

**Supplementary Figure 1.** Analysis of the angle between the proximal segment of the RCA and the ascending aorta.

Angle was measured during systole ( $\alpha$ ) and diastole ( $\alpha'$ ) and the change ( $\Delta\alpha = \alpha - \alpha'$ ) was calculated. Panel A showed pre-intervention and Panel B showed post-intervention at index procedure. Panel C showed restenosis including ostium of RCA before repeat revascularization. RCA denotes right coronary artery.

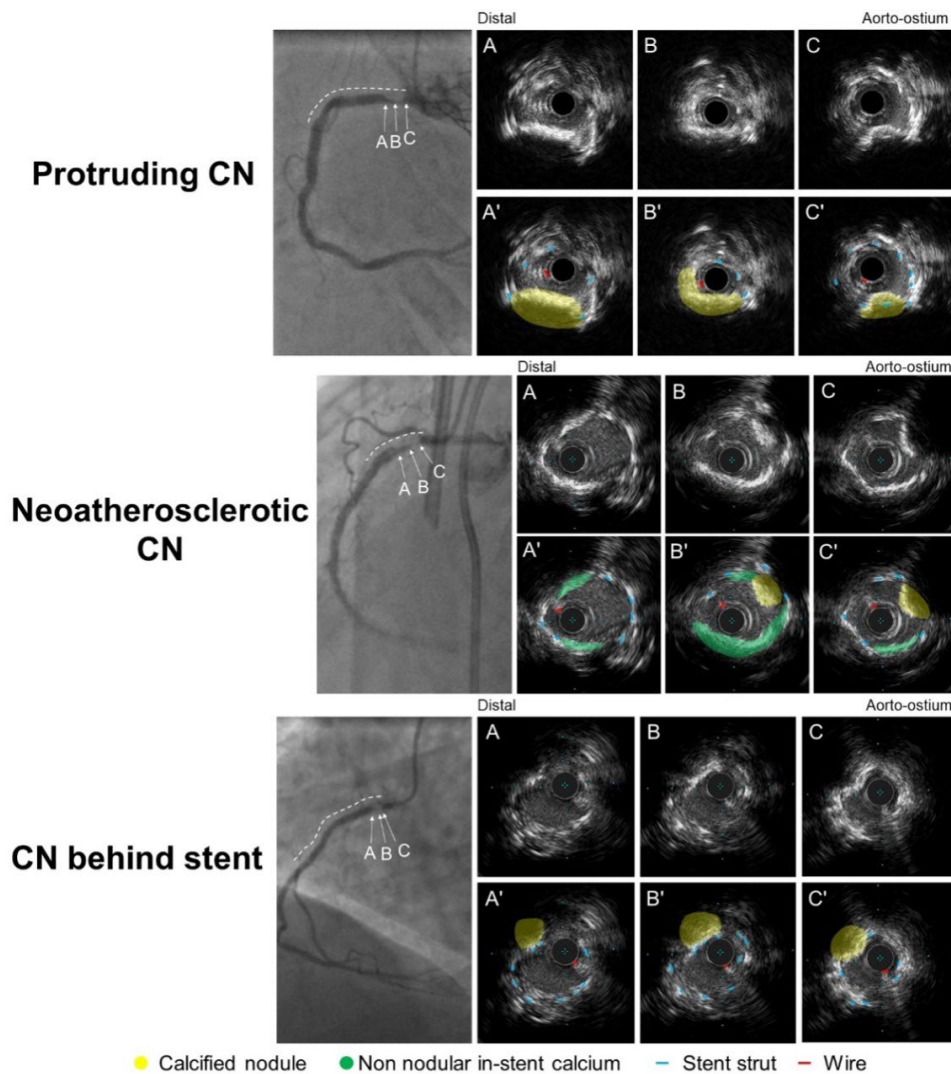

**Supplementary Figure 2.** Representative cases of protruding CN, neoatherosclerotic CN, and CN behind the stent.

Yellow area indicate CN and green area indicates neoatherosclerotic calcium. Top panel: There is no adjacent neointimal hyperplasia to the CN indicating protruding calcium through the stent struts. Middle panel: There is an adjacent neoatherosclerotic calcium (green area) indicating CN developed as a part of neoatherosclerosis. Bottom panel: There is a CN behind stent struts (blue dotted line) without neointimal hyperplasia or neoatherosclerosis within the stent. The

differentiation of these images requires checking proximal or distal to the current region of interest frame. CN denotes calcified nodule.

**Overlap**

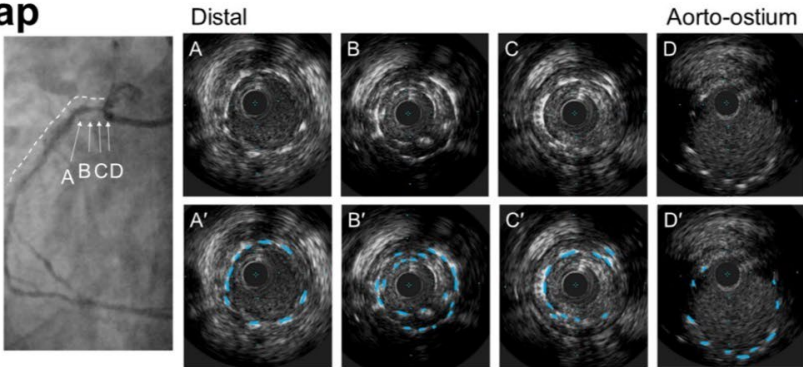

**Non-overlap**

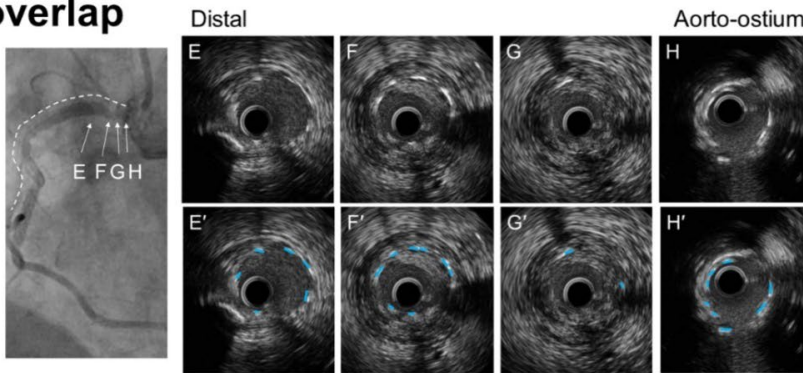

**Deformation**

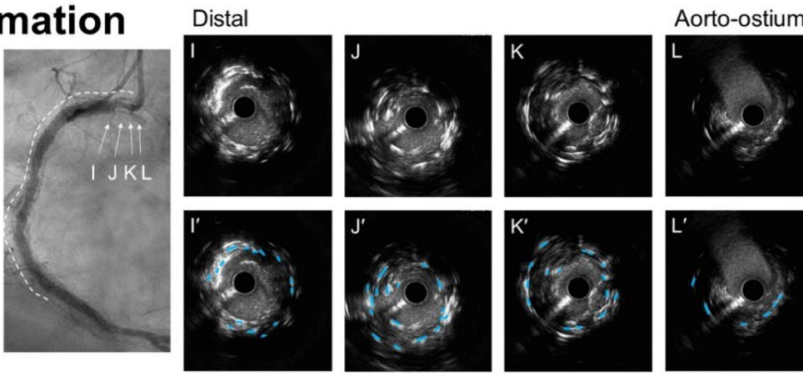



**Supplementary Figure 3.** Representative cases of stent fracture or deformation.

Top panel: There are double layers appearance of stent struts (blue dotted line in B and C) with preserved 3-dimensional stent integrity indicating overlapped type of stent fracture. Middle panel: There was no struts in G except one strut at 3 and 12 o'clock indicating partial stent fracture (non-overlap type). Bottom panel: There are multiple layers of stent struts with loss of 3-dimensional stent integrity indicating stent deformation.

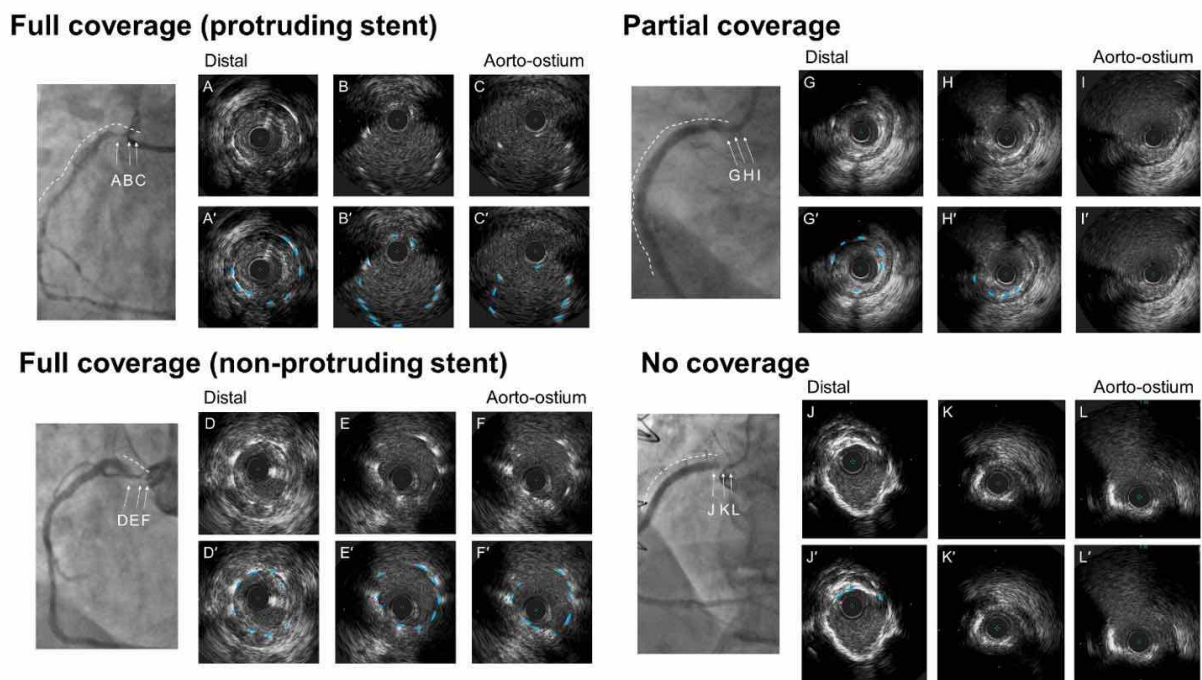

**Supplementary Figure 4.** Representative cases of full coverage (protruding stent), full coverage (non-protruding stent), partial coverage, or no coverage.

Top left panel: Protruding stent struts were found; thus, the ostium was fully covered. IVUS catheter was outside of stent without deforming the stent integrity (C). Bottom left panel: The

length of protruding struts measured <1mm in length. Top right panel: There is no struts at 9 to 4 o'clock (H) at the ostium indicating partial coverage of ostium. Bottom right panel: There is no strut at all at the ostium indicating no coverage of ostium (K). IVUS denotes intravascular ultrasound.

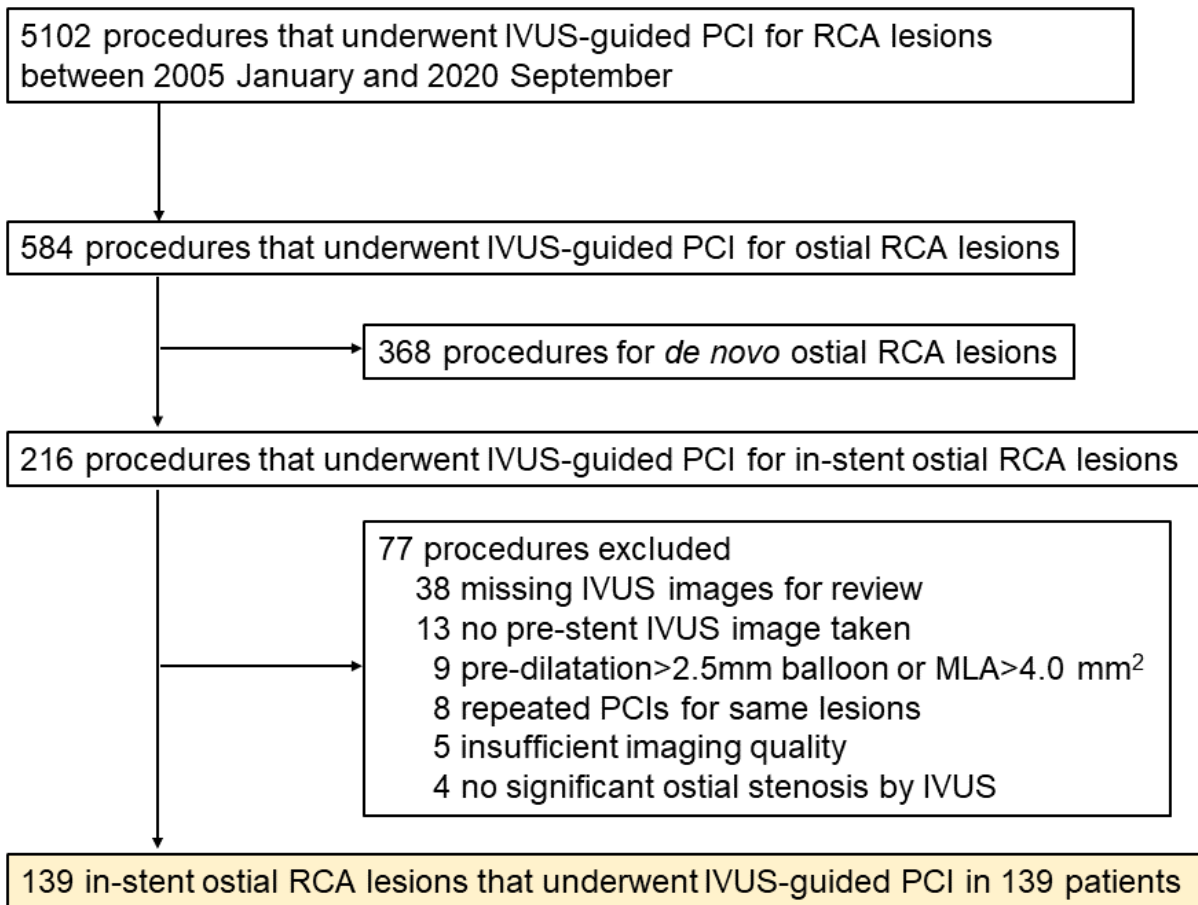

**Supplementary Figure 5.** Flowchart of exclusion and inclusion of lesions.

Among 5102 procedures that underwent IVUS-guided PCI for RCA lesions, finally 139 RCA ostial in-stent restenotic lesions consist of current cohort. PCI denotes percutaneous coronary intervention.

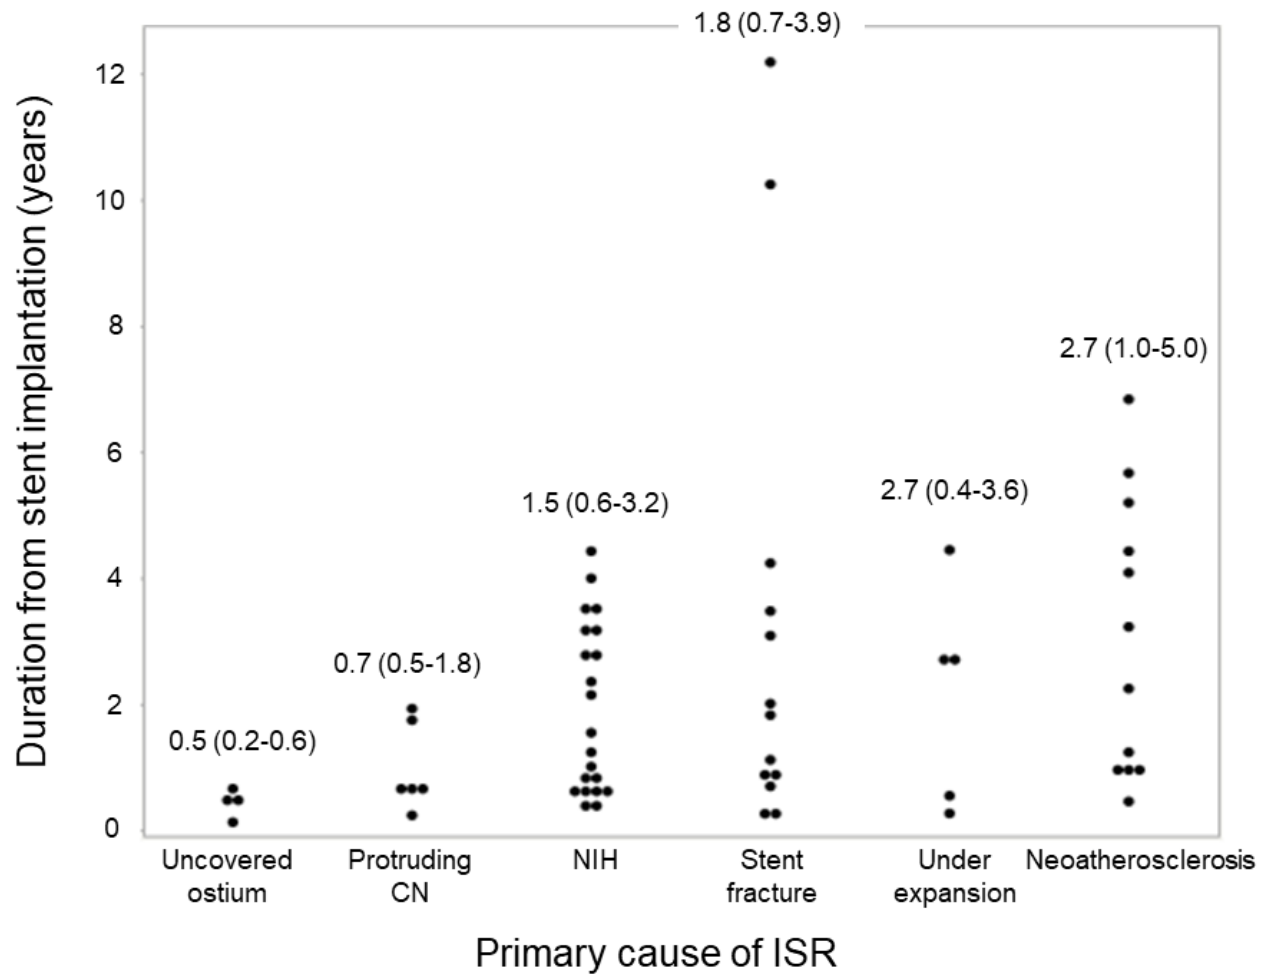

**Supplementary Figure 6.** Duration from stent implantation (years) stratified by primary cause of in-stent restenosis.

Except ISR lesions with stent fracture which had substantial range of duration, the other ISR occurred at different timing based on the different cause of ISRs. ISR denotes in-stent restenosis.

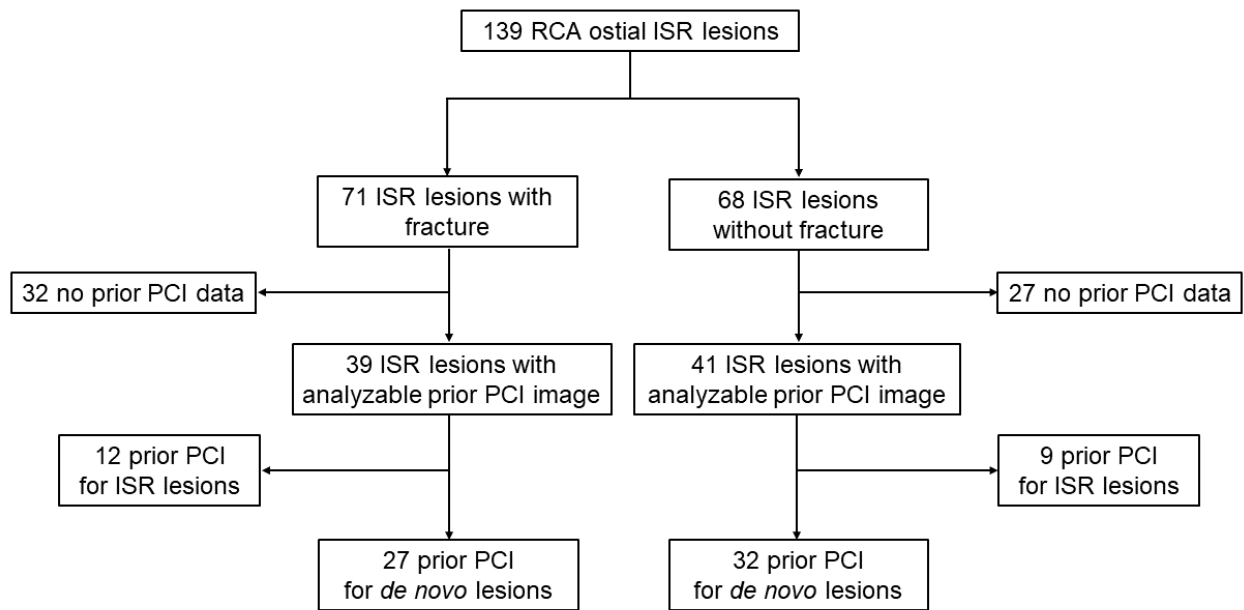

**Supplementary Figure 7.** Flowchart of exclusion and inclusion of lesions for angiographic hinge motion analysis at index and follow-up.

Among 139 RCA ostial ISRs, index angiography was available in 57 RCA ostial ISRs.

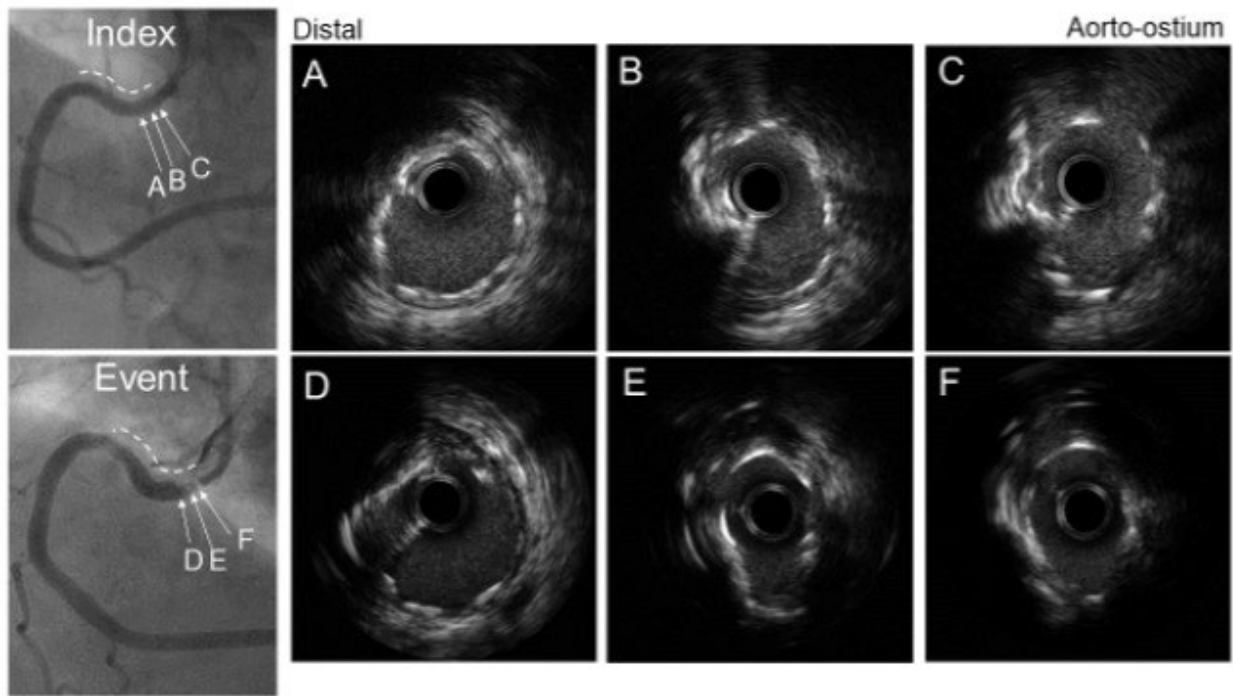

**Supplementary Figure 8.** A case example showing stent recoil.

The top panel showed final IVUS images at index procedure and the bottom panel showed IVUS images at the time of in-stent restenosis. Minimum stent area measured  $6.4 \text{ mm}^2$  (B) and  $5.4 \text{ mm}^2$  (E) indicating stent recoil, respectively.
